# Supplementary material for: Integration of MsrB1 and MsrB2 in the Redox Network during the Development of Orthodox and Recalcitrant Acer Seeds
Source: PubMed Central journal article supplement (PMC7763665; doi:10.3390/antiox9121250), 2020-12-09

**Figure S1** Determinations of standards of methionine sulfoxide (MetSO), methionine (Met), tyrosine (Tyr), and tryptophan (Trp) further used for the calibration curves. A representative chromatogram indicating peaks recognized at 214 nm is given.

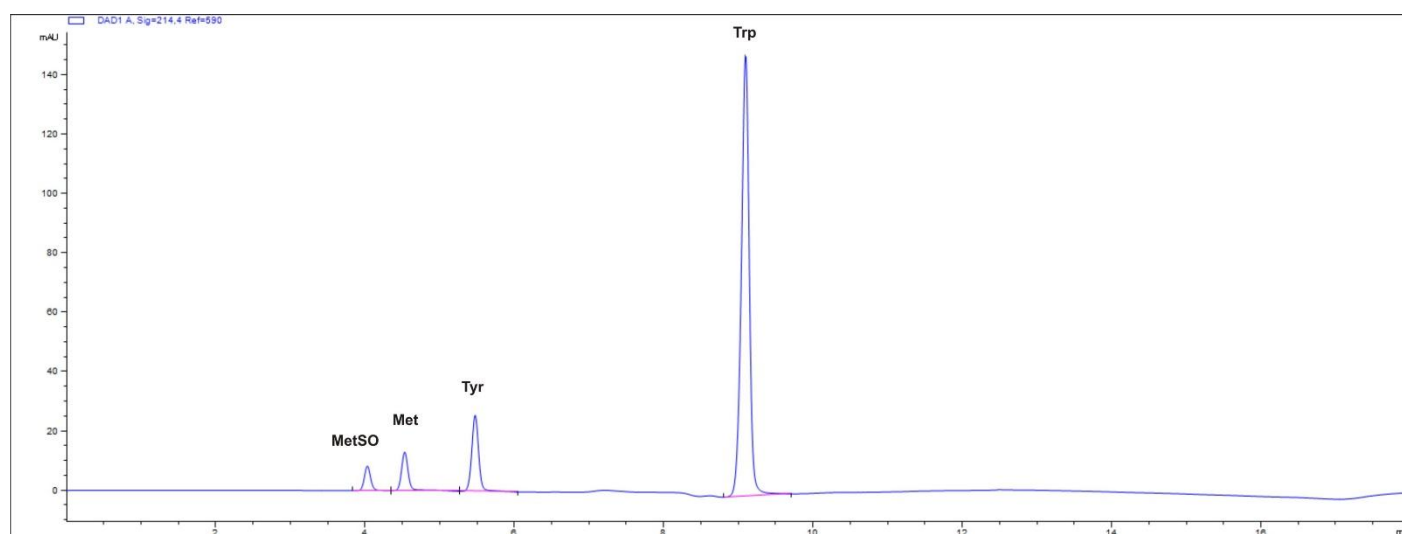

**Figure S2** SDS-PAGE representative gels of protein extracts (20  $\mu$ g) isolated from embryonic axes and cotyledons of Norway maple (A) and sycamore (B) seeds further used for Western blot analyses. Analyses concerned proteins originating from 11-23 weeks after flowering (WAF). The Spectra<sup>TM</sup> Multicolor Broad Range Protein Ladder marker (Thermo Scientific) was used to calculate the molecular weight. Gels were documented with (A) G:BOX Chemi XR5 instrument (Syngene, Cambridge, UK) and Coomassie Blue filter settings, (B) Fire Reader Gel Documentation System.

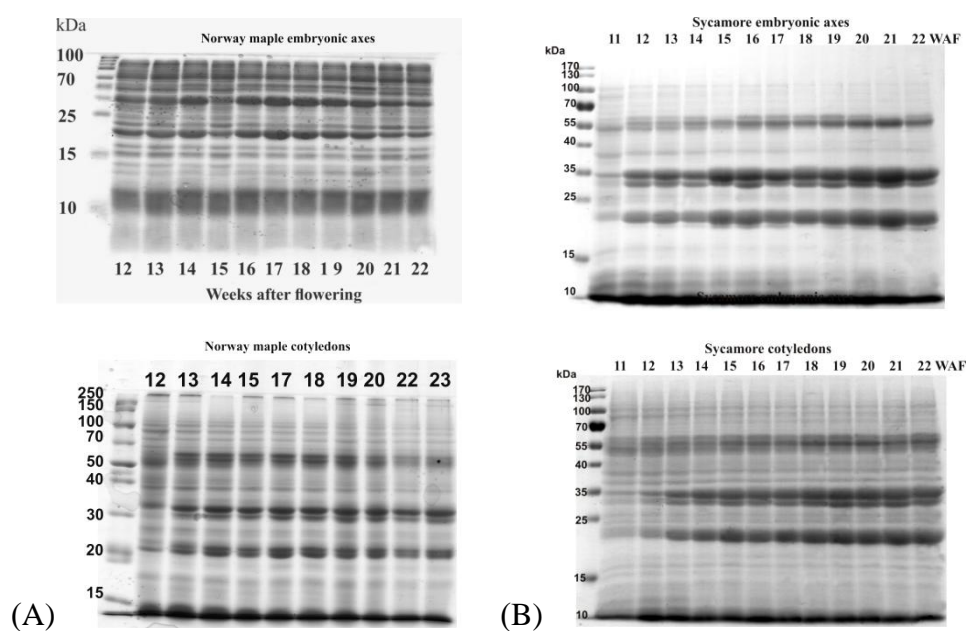

**Figure S3** Changes in the levels of soluble protein in embryonic axes and cotyledons of *Acer platanoides* (squares) and *A. pseudoplatanus* (circles) developing seeds collected at the range of 11<sup>th</sup> - 23<sup>rd</sup> weeks after flowering. Data are the means of three independent replicates  $\pm$  the standard error. Statistically significant differences are indicated with different letters (one-way ANOVA, followed by Tukey's test at  $p < 0.05$ ). The capital letters refer to the *A. pseudoplatanus*.

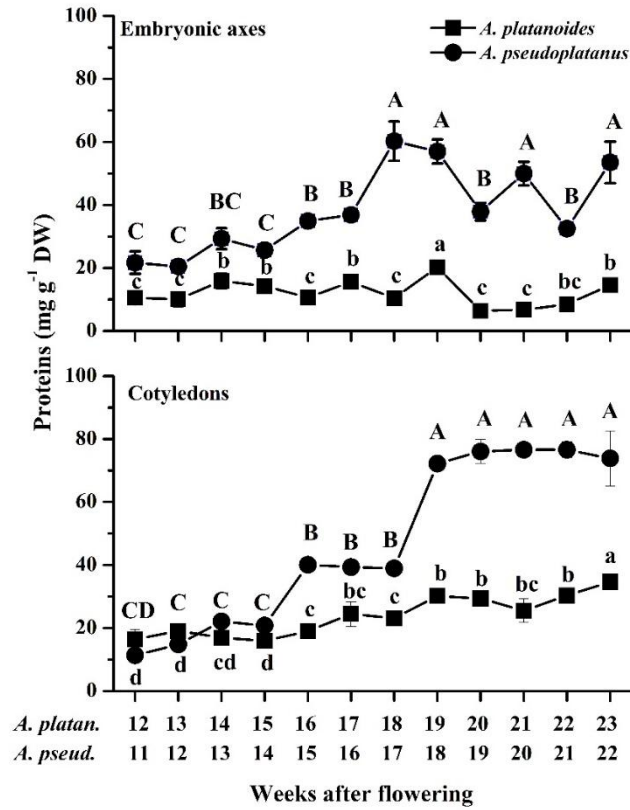

**Figure S4** Western blots with negative results.

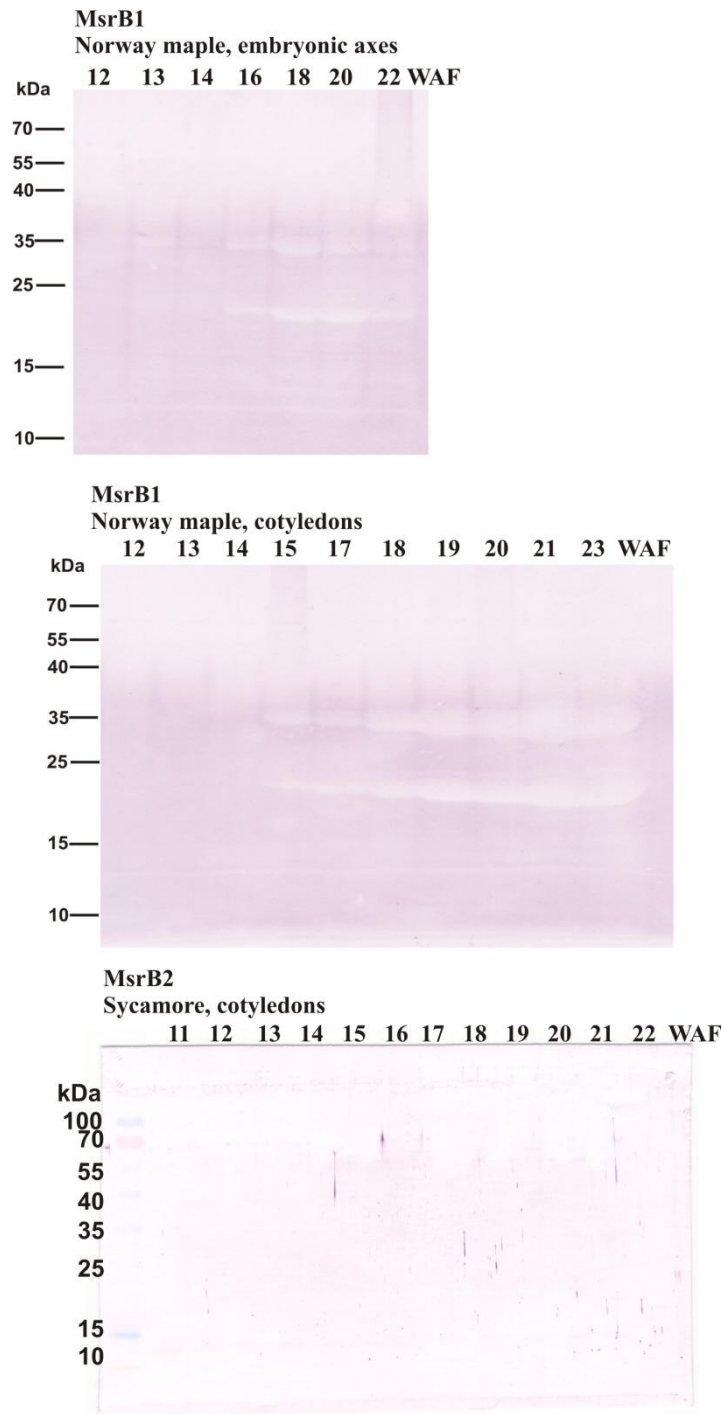

**Figure S5** Correlation matrices calculated for embryonic axes (A) and cotyledons (B) of Norway maple (*Acer platanoides*), and embryonic axes (C) and cotyledons (D) of sycamore (*Acer pseudoplatanus*) based on levels of ascorbic acid (AsA), dehydroascorbic acid (DHA), total pool of ascorbate (Asc), Asa to DHA ratio (AsA/DHA ratio), levels of reduced glutathione (GSH), oxidized glutathione (GSSG), total pool of glutathione (TotalG), degree of oxidation of glutathione (DO), levels of reduced (NADH) and oxidized (NAD<sup>+</sup>) nicotinamide adenine dinucleotide, NADH to NAD<sup>+</sup> ratio (NADH/NAD<sup>+</sup> ratio), levels of reduced (NADPH) and oxidized (NADP<sup>+</sup>) nicotinamide adenine dinucleotide phosphate, NADPH to NADP<sup>+</sup> ratio (NADPH/NADP<sup>+</sup> ratio), water content (WC), levels of protein-bound methionine sulfoxide (MetO), the abundance of methionine sulfoxide reductase isoforms (MsrB1, MsrB2), activity of NADPH-dependent reductases (TotR). Crossed numbers indicate non-significant correlation ( $P > 0.05$ ).

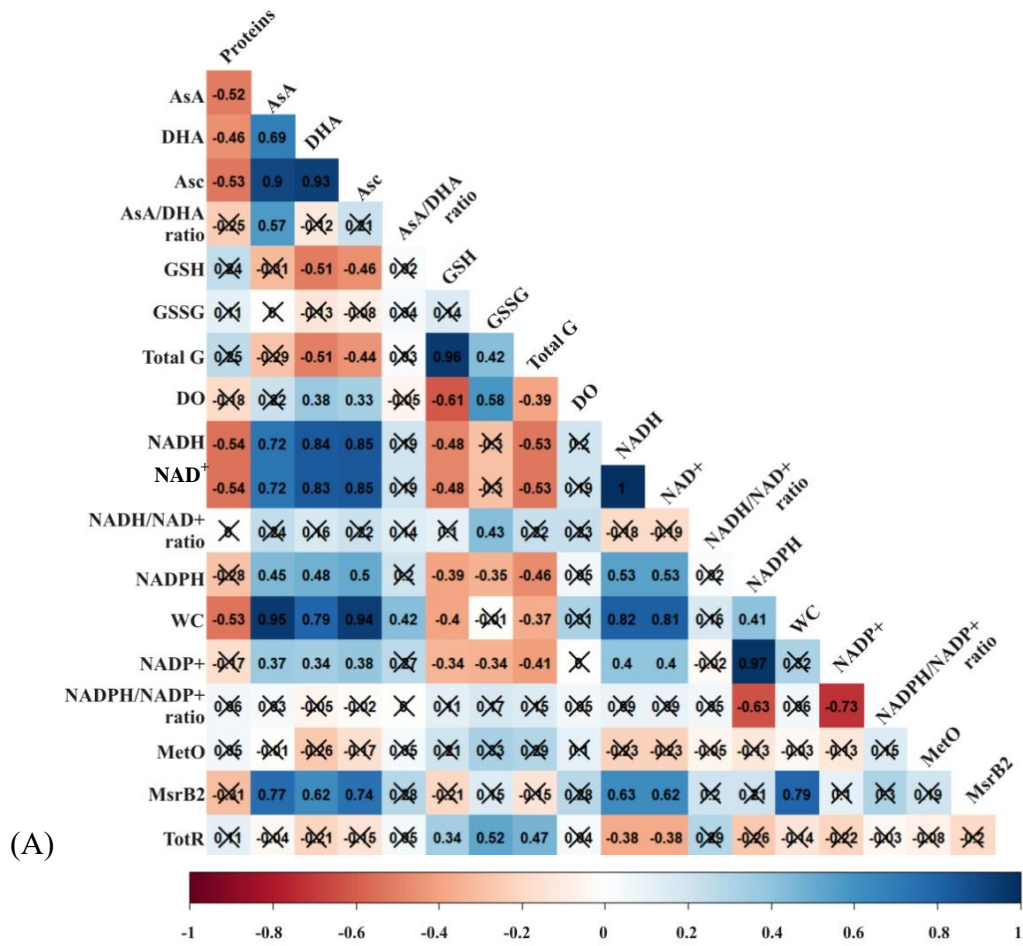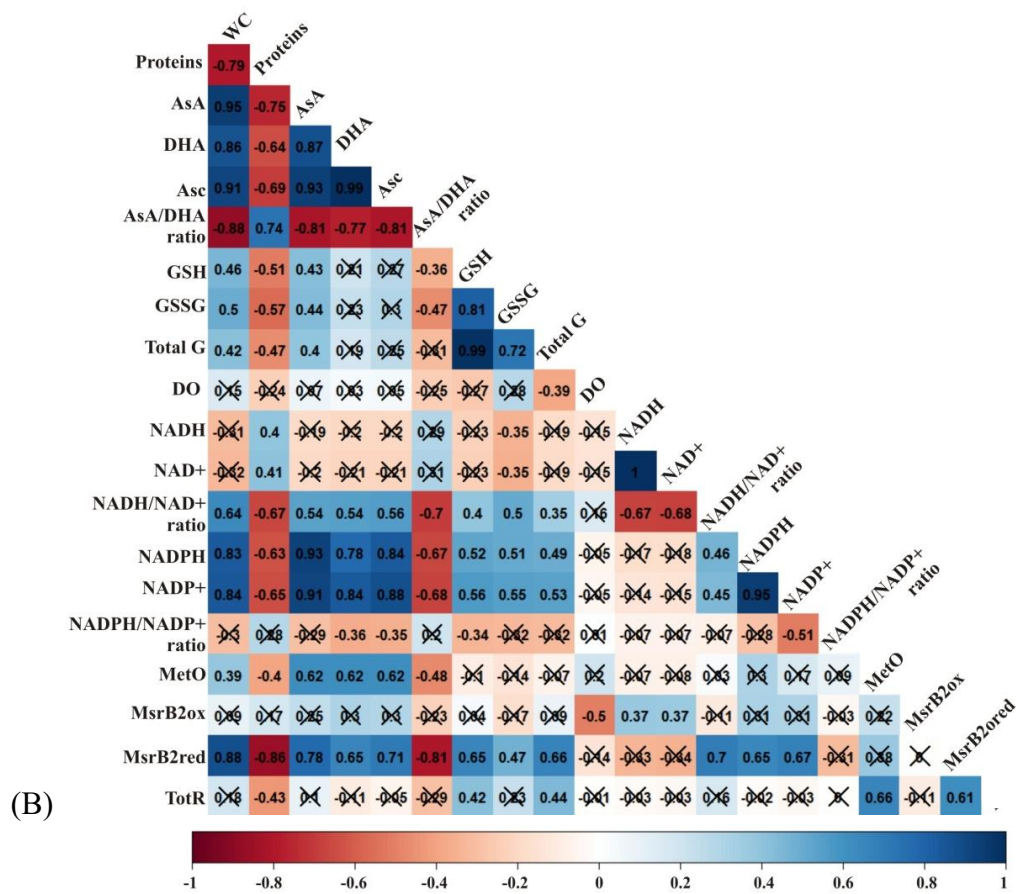



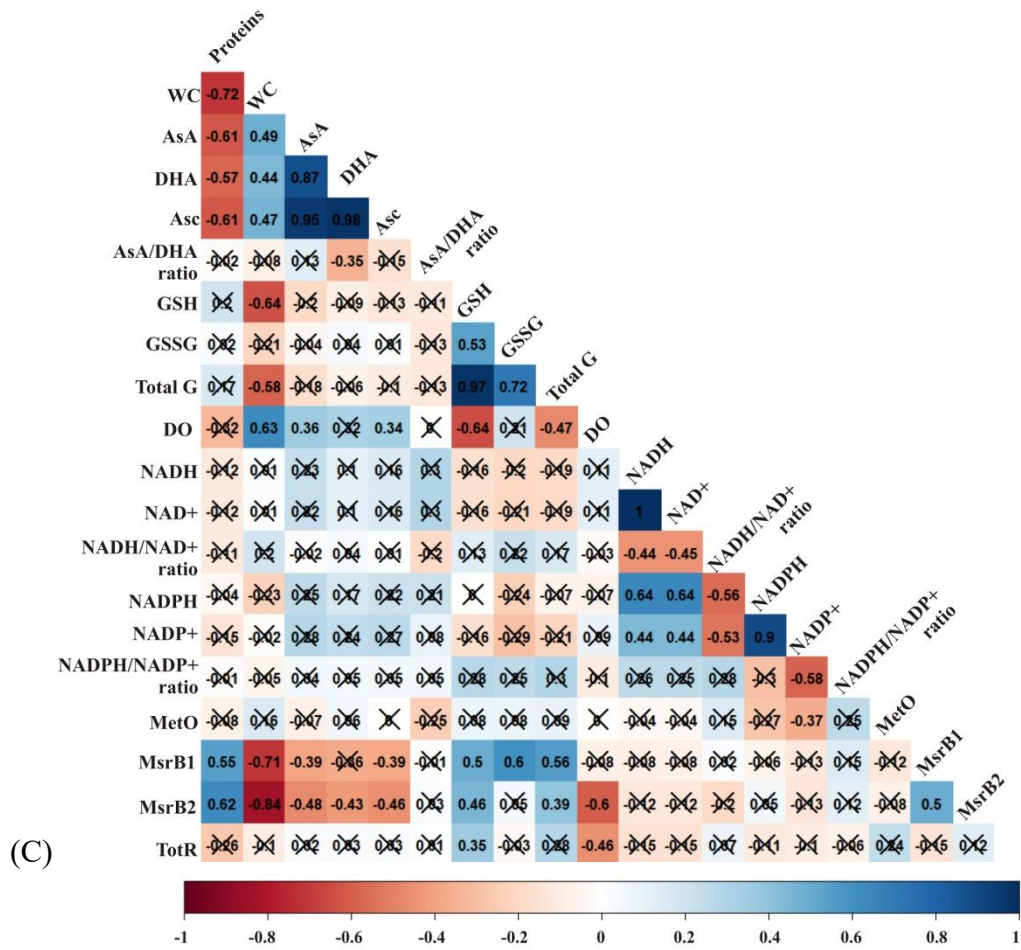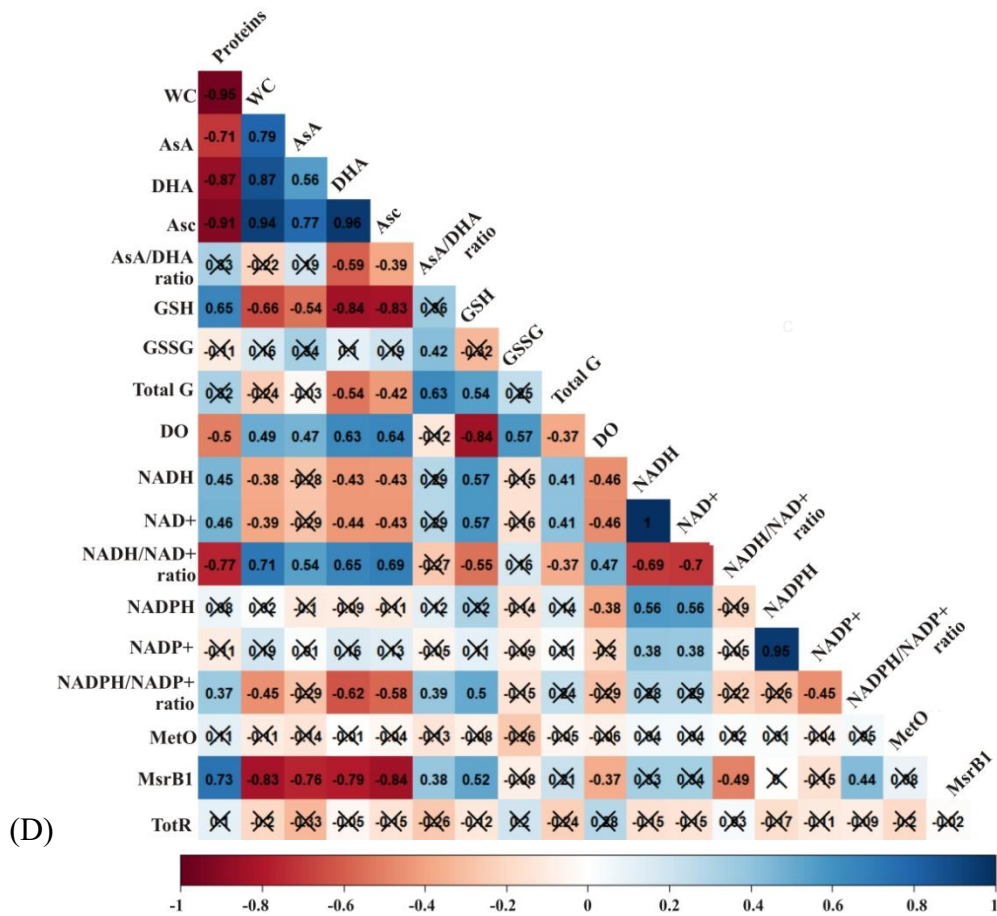

Supplement: antioxidants-09-01250-s001.pdf [file antioxidants-09-01250-s001.pdf]
